## Competing Interests

The author declares no competing interests.

**Erin Hurwitz, M.D.**, Affiliated Anesthesiologists, LLC, Oklahoma City, Oklahoma. erin.hurwitz@gmail.com

## References

1. Hurwitz EE, Simon M, Vinta SR, Zehm CF, Shabot SM, Minhajuddin A, Abouleish AE: Adding examples to the ASA-Physical Status Classification improves correct assignment to patients. *ANESTHESIOLOGY* 2017; 126:614–22
2. Owens WD, Felts JA, Spitznagel EL Jr: ASA Physical Status Classifications: A study of consistency of ratings. *ANESTHESIOLOGY* 1978; 49:239–43
3. Haynes SR, Lawler PG: An assessment of the consistency of ASA physical status classification allocation. *Anaesthesia* 1995; 50:195–9
4. Sankar A, Johnson SR, Beattie WS, Tait G, Wijesundera DN: Reliability of the American Society of Anesthesiologists physical status scale in clinical practice. *Br J Anaesth* 2014; 113:424–32

(Accepted for publication September 28, 2017.)

## Use of Vasopressin in Vasoplegic Syndrome with Reduced Ejection Fraction: Asking for Trouble

*To the Editor:*

I read the article by Hajjar *et al.* with great enthusiasm.<sup>1</sup> First, I would like to congratulate the authors for their ambitious study and reasonable conclusions. They concluded that vasopressin improved clinical outcomes better than norepinephrine in vasoplegic shock after cardiac surgery. I would like to discuss the concerns associated with the use of a pure vasoconstrictor after cardiac surgery.

Transient or sustained vasoplegia is not uncommon after cardiac surgery and it is characterized by a fall in systemic vascular resistance (SVR).<sup>2</sup> In addition, myocardial stunning or hibernation after cardiac surgery commonly results in reduction of left ventricular ejection fraction.<sup>3</sup> Furthermore, preoperative low ejection fraction is one of the most documented predictors for vasoplegia after on-pump cardiac surgery.<sup>2</sup> A reduction in SVR may be associated with improvement in cardiac index.<sup>4</sup> To maintain systemic blood pressure solely by increasing SVR without augmenting cardiac contractility may prove counterproductive.<sup>5</sup> Therefore, our target should be to maintain SVR within normal limits.<sup>6</sup> Although the authors mentioned that the cardiac index did not change after vasopressor infusion, in patients with reduced ejection fraction, cardiac index expectedly reduces after pure vasoconstrictor infusion.<sup>7</sup> Vasopressin-related myocardial dysfunction does not arise as a result of increase in SVR, but from a direct effect on cardiac contractility.<sup>8</sup> In the current study, the majority of patients (53%) had a normal preoperative ejection fraction (greater than 60%). Unlike vasopressin, its receptor antagonist

has shown to improve left ventricular systolic function.<sup>9,10</sup> An assessment of ejection fraction in vasoplegic syndrome would have been ideal for better interpretation of the results of this study. In patients with preserved ejection fraction, vasopressin may prove superior to norepinephrine, but generalization of this study finding in patients with vasoplegic syndrome and diminished ejection fraction could be debatable.

## Competing Interests

The author declares no competing interests.

**Ajay Kumar Jha, M.D., D.M.**, All India Institute of Medical Sciences, Bhubaneswar, India. drajaykjh@rediffmail.com

## References

1. Hajjar LA, Vincent JL, Barbosa Gomes Galas FR, Rhodes A, Landoni G, Osawa EA, Melo RR, Sundin MR, Grande SM, Gaiotto FA, Pomerantzeff PM, Dallan LO, Franco RA, Nakamura RE, Lisboa LA, de Almeida JP, Gerent AM, Souza DH, Gaiane MA, Fukushima JT, Park CL, Zambolim C, Rocha Ferreira GS, Strabelli TM, Fernandes FL, Camara L, Zeferino S, Santos VG, Piccioni MA, Jatene FB, Costa Auler JO Jr, Filho RK: Vasopressin *versus* norepinephrine in patients with vasoplegic shock after cardiac surgery: The VANCS randomized controlled trial. *ANESTHESIOLOGY* 2017; 126:85–93
2. Argenziano M, Chen JM, Choudhri AF, Cullinane S, Garfein E, Weinberg AD, Smith CR Jr, Rose EA, Landry DW, Oz MC: Management of vasodilatory shock after cardiac surgery: Identification of predisposing factors and use of a novel pressor agent. *J Thorac Cardiovasc Surg* 1998; 116:973–80
3. Appleyard RF, Cohn LH: Myocardial stunning and reperfusion injury in cardiac surgery. *J Card Surg* 1993; 8(2 Suppl): 316–24
4. Bixler TJ, Gardner TJ, Donahoo JS, Brawley RK, Potter A, Gott VL: Improved myocardial performance in postoperative cardiac surgical patients with sodium nitroprusside. *Ann Thorac Surg* 1978; 25:444–8
5. Ertmer C, Morelli A, Bone HG, Stubbe HD, Schepers R, Van Aken H, Lange M, Bröking K, Lücke M, Traber DL, Westphal M: Dobutamine reverses the vasopressin-associated impairment in cardiac index and systemic oxygen supply in ovine endotoxemia. *Crit Care* 2006; 10:R144
6. Klinzing S, Simon M, Reinhart K, Bredle DL, Meier-Hellmann A: High-dose vasopressin is not superior to norepinephrine in septic shock. *Crit Care Med* 2003; 31:2646–50
7. Dünser MW, Hasibeder WR: Vasopressin in vasodilatory shock: Ensure organ blood flow, but take care of the heart! *Crit Care* 2006; 10:172
8. Asfar P, Radermacher P: Vasopressin and ischaemic heart disease: More than coronary vasoconstriction? *Crit Care* 2009; 13:169
9. Suzuki S, Yoshihisa A, Yamaki T, Sugimoto K, Kunii H, Nakazato K, Abe Y, Saito T, Ohwada T, Suzuki H, Saitoh S, Kubota I, Takeishi Y: AVCMA investigators: Vasopressin V2 receptor antagonist tolaptan is effective in heart failure patients with reduced left ventricular systolic function and low blood pressure. *Int Heart J* 2015; 56:213–8
10. Yamazaki T, Izumi Y, Nakamura Y, Yamashita N, Fujiki H, Osada-Oka M, Shiota M, Hanatani A, Shimada K, Iwao H, Yoshiyama M: Tolaptan improves left ventricular dysfunction after myocardial infarction in rats. *Circ Heart Fail* 2012; 5:794–802

(Accepted for publication September 29, 2017.)
